1  
2  
3  
4  
5  
6  
7  
8  
9  
10  
11  
12  
13  
14  
15  
16  
17  
18  
19  
20  
21  
22  
23  
24  
25  
26  
27  
28

**The conserved metalloprotease invadolysin is present in invertebrate  
haemolymph and vertebrate blood**

Running title: Extracellular invadolysin

Kanishk Abhinav <sup>1</sup>, Linda Feng <sup>1</sup>, Emma Morrison <sup>1</sup>, Yunshin Jung <sup>2</sup>, James Dear <sup>1</sup>, Satoru Takahashi <sup>2</sup> and Margarete M. S. Heck <sup>1</sup>

<sup>1</sup> University of Edinburgh  
Queen's Medical Research Institute  
University / BHF Center for Cardiovascular Science  
47 Little France Crescent  
Edinburgh EH16 4TJ, UK

<sup>2</sup> Department of Anatomy and Embryology  
Faculty of Medicine  
University of Tsukuba  
Tsukuba, Japan

Corresponding author's email: [margarete.heck@ed.ac.uk](mailto:margarete.heck@ed.ac.uk)  
tel: +44 (0)131 242 6694

Key words: invadolysin, protease, metalloprotease, plasma, hemolymph

29 **Summary Statement**

30

31 In this study, we show that the conserved metalloprotease invadolysin is present in invertebrate  
32 hemolymph and vertebrate blood, suggesting the protein may function in organismal physiology.

33

34

35 **Abstract**

36

37 We identified invadolysin, a novel essential metalloprotease, for functions in chromosome structure,  
38 cell proliferation and migration. Invadolysin also plays an important metabolic role in insulin  
39 signaling and is the only protease known to localise to lipid droplets, the main lipid storage organelle  
40 in the cell. *In silico* examination of the protein sequence of invadolysin predicts not only protease  
41 and lipase catalytic motifs, but also post-translational modifications and the secretion of invadolysin.  
42 Here we show that the protease motif of invadolysin is important for its role in lipid accumulation,  
43 but not in glycogen accumulation. The lipase motif does not appear to be functionally important for  
44 accumulation of lipids or glycogen. Post-translational modifications likely contribute to modulating  
45 the level, localisation or activity of invadolysin. We identified a secreted form of invadolysin in the  
46 soluble fraction of invertebrate hemolymph (where we observe sexually dimorphic forms) and also  
47 vertebrate plasma, including in the extracellular vesicle fraction. Biochemical analysis for various  
48 post-translational modifications demonstrated that secreted invadolysin is both N- and O-  
49 glycosylated, but not apparently GPI-linked. The discovery of invadolysin in the extracellular milieu  
50 suggests a role for invadolysin in normal organismal physiology.

## 51 Introduction

52

53 Proteases perform a wide array of functions in normal physiology ranging from cell  
54 proliferation, differentiation and death - to digestion, blood coagulation and complement pathway  
55 activation (Lecker *et al.*, 2006; Vandenabeele *et al.*, 2005; Walsh and Ahmad, 2002; Werb *et al.*,  
56 1999). *In silico* analyses of metazoan genomes have identified more than 500 proteases and  
57 inhibitors accounting for approximately 2-5% of total gene number (Puentes *et al.*, 2003; Turk, 2006).  
58 With such a high percentage of the genome dedicated to protein turnover, it is somewhat surprising  
59 that to date, only a small fraction of these enzymes have been thoroughly investigated. Therefore,  
60 the characterisation of novel proteases is an important area of investigation, improving our  
61 understanding of the role of proteases in normal physiology and disease pathophysiology.

62 The ability to perform a wide variety of functions, coupled with the modulation of enzymatic  
63 activity, make proteases attractive drug targets. ACE (Angiotensin-Converting Enzyme) inhibitors are  
64 widely used for treating hypertension, myocardial infarction and renal failure (Wong *et al.*, 2004).  
65 HIV (Human Immunodeficiency Virus) protease inhibitors have been successfully used to treat HIV-  
66 infected patients (Flexner, 1998). On the other hand, development of MMP inhibitors for treatment  
67 of connective tissue diseases failed during clinical trials, due largely to off-target effects (Cathcart and  
68 Cao, 2015). These results further signify the importance of a more thorough investigation of  
69 proteases and their activities to improve the development of protease-based therapies.

70 Invadolysin plays an important role in the cell cycle, cell migration and the maintenance of  
71 normal chromosome structure. Crucially, the gene is essential for life in *Drosophila* and plays  
72 analogous roles in zebrafish (McHugh *et al.*, 2004; Rao *et al.*, 2015)(Vass and Heck, 2013).  
73 Invadolysin has a conserved metalloprotease motif (HEXXH) and is the only member of the single-  
74 gene M8 family of metalloproteases in metazoa (McHugh *et al.*, 2004) – the prototype of this family  
75 being the Leishmanolysin/GP63 protease from *Leishmania*. To date, invadolysin is the only protease  
76 shown to localise to lipid droplets, the primary lipid storage organelle of the cell (Cobbe *et al.*, 2009).  
77 More recent studies have identified key roles for invadolysin in metabolism including insulin  
78 signaling, lipid accumulation and the maintenance of normal mitochondrial function (Chang *et al.*,  
79 2016; Di Cara *et al.*, 2013). Though a fairly conserved lipase motif lies downstream of the highly  
80 conserved protease motif, neither of these motifs has been thoroughly examined in invadolysin's  
81 function. Are the protease and lipase motifs functional and do they contribute to invadolysin's  
82 activity?

83 Protease activity may be regulated by various strategies such as irreversible activation of an  
84 inactive zymogen, reversible binding of cofactors, or exposure to different intra- or extra-cellular

85 millieus (Twining, 1994). Physical subcellular compartmentalisation is also utilised to regulate  
86 protease activity (Brix *et al.*, 2013). Proteases may exist in soluble intracellular, membrane-bound, or  
87 extracellular forms. As proteases generally have numerous substrates, regulating substrate  
88 localization or accessibility will also serve to modulate activity (Schauperl *et al.*, 2015). Furthermore,  
89 post-translational modifications such as phosphorylation, N- or O-linked glycosylation or GPI-anchor  
90 addition may not only affect protein structure and stability, but also impact on substrate interaction  
91 and binding affinity (Goettig, 2016). All these factors further add to the complexity of the  
92 mechanisms regulating protease activity. In this study, we address the biosynthesis and post-  
93 translational modification of invadolysin.

94         The first evidence for a diffusible protease was demonstrated using a tadpole explant that  
95 was capable of degrading a collagen gel (Gross and Lapiere, 1962). A number of extracellular  
96 proteases have been discovered since. Proteases such as chymotrypsin, trypsin and  
97 carboxypeptidase (components of the digestive system) are responsible for hydrolysing proteins  
98 before absorption in the gastrointestinal tract (Szmola *et al.*, 2011). Extracellular proteases play  
99 important roles in angiogenesis, tissue remodelling and wound healing (Birkedal-Hansen *et al.*, 1993;  
100 Verma and Hansch, 2007). The ADAMTSs (A Disintegrin And Metalloproteinase with  
101 ThromboSpondin motifs) family of extracellular metalloproteases are important for angiogenesis  
102 (Rodríguez-Manzaneque *et al.*, 2015), whereas secreted metalloproteases such as MMPs (Matrix  
103 MetalloProteinase) play vital roles in extracellular matrix remodelling (Birkedal-Hansen *et al.*, 1993).  
104 ADAMTSs and MMPs, each represented by complex multi-gene families, are some of the better-  
105 characterised secreted proteases. However, functional redundancy of other family members often  
106 complicates interpretation of phenotypic disruption.

107         We previously demonstrated that invadolysin plays a crucial role in metabolism and energy  
108 storage in *Drosophila* (Chang *et al.*, 2016; Cobbe *et al.*, 2009). We set about further examining these  
109 functions using a number of approaches. We generated transgenic fly lines that expressed either  
110 wild type, protease- or lipase-dead forms of invadolysin and compared lipid and glycogen  
111 accumulation amongst them. *In silico* analysis of the invadolysin sequence identified potential sites  
112 of post-translational modifications, which suggested not only phosphorylation, glycosylation and GPI-  
113 anchor addition, but also the secretion of invadolysin. This led to our discovery of invadolysin in the  
114 soluble fraction of both vertebrate blood and invertebrate hemolymph. While secreted invadolysin  
115 is glycosylated, it does not appear to have a GPI-anchor. A portion of this secreted invadolysin is  
116 present in a human plasma fraction enriched for extracellular vesicles, suggesting additional roles in  
117 mediating communication between cells or tissues. Our present study opens new avenues of  
118 research into the physiological role(s) of extracellular invadolysin.

## 119 Results

120

### 121 *In silico* identification of conserved sequence features of invadolysin

122 Metalloproteases are generally zinc-dependent enzymes that have a conserved HEXXH  
123 (zincin) or HXXEH (inverzincin) metalloprotease motif (Gomis-Rüth, 2003). In addition to having the  
124 classical HEXXH zincin metalloprotease motif, invadolysin also has a third conserved histidine residue  
125 and a downstream Met-turn (Figure 1, red and green), placing invadolysin in the M8 subfamily of  
126 metalloproteases (McHugh *et al.*, 2004). Leishmanolysin/GP63, a major surface protease of  
127 *Leishmania major* (though also found intra- and extra-cellularly), is the prototype for the M8  
128 leishmanolysin subfamily of metalloproteases (Gomis-Rüth, 2003; McGwire *et al.*, 2002). Invadolysin  
129 additionally has a conserved lipase (GX SXG) motif just downstream of the protease motif (Figure 1,  
130 purple). The lipase motif consists of two glycines and a serine where the serine is the catalytically-  
131 active residue (Wong and Schotz, 2002).

132 Human invadolysin is represented by 4 different variants – two for each of two different N-  
133 terminal variants which vary by alternative splicing of a 37 amino acid exon (between yellow  
134 arrowheads). Invadolysin variant 1 is predicted to encode an N-terminal signal sequence when  
135 analysed by SignalP 4.1 (a signal sequence prediction server) (Figure 1, light blue) (Nielsen *et al.*,  
136 1997; Petersen *et al.*, 2011). Variant 2 (not found in mouse or fly) is not predicted to encode an N-  
137 terminal signal sequence. Synthesis of variant 2 is dependent on the use of an alternative translation  
138 start site (Cobbe *et al.*, 2009). Though variant 2 can be detected by RT-PCR, it is not as prevalent as  
139 variant 1, and under what conditions it is translated is currently under investigation. We have  
140 identified the expression of variant 2 during the later stages of *in vitro* adipogenesis (Chang *et al.*,  
141 2016). *in silico* analysis of invadolysin open reading frames from different species thus suggests the  
142 presence of a signal sequence that could target the translation of invadolysin to the secretory  
143 pathway.

144 The classical or conventional pathway of protein secretion utilises an N-terminal signal  
145 sequence to target the nascent protein to the endoplasmic reticulum and subsequently to the Golgi  
146 apparatus (Lippincott-Schwartz *et al.*, 2000). The protein may then translocate from the Golgi  
147 apparatus to the cell surface or be secreted via extracellular vesicles (Bendtsen *et al.*, 2004;  
148 Lippincott-Schwartz *et al.*, 2000). Proteins frequently undergo assorted post-translational  
149 modifications during their transport within the secretory pathway. N-glycosylation and C-terminal  
150 GPI-anchor addition occur within the endoplasmic reticulum (Aebi, 2013; Eisenhaber *et al.*, 2001),  
151 while O-glycosylation occurs in the Golgi apparatus (Spiro, 2002). Big-PI Predictor (Eisenhaber *et al.*,  
152 1999) predicted the presence of a GPI-anchor site near the C-terminus of invadolysin (Figure 1, dark

153 blue). A GPI-addition could anchor invadolysin to the plasma membrane (Fujita and Kinoshita, 2012;  
154 Orlean and Menon, 2007). The presence of several N-glycosylation (orange) and O-glycosylation  
155 (turquoise) sites are also predicted for invadolysin, (NetNGlyc 1.0) (Gupta and Brunak, 2002) and  
156 (NetOGlyc 3.1) (Steentoft *et al.*, 2013) respectively. Biochemical analysis of these predicted motifs in  
157 invadolysin is addressed below.

158 As highlighted in our identification of invadolysin (McHugh *et al.*, 2004), the higher  
159 eukaryotic forms of invadolysin all contain distinct regions of sequence that are not present in  
160 leishmanolysin (Figure 1, visible as gaps in the bottom row of the alignment). In spite of this, 9 pairs  
161 of cysteines are conserved in spacing and position (Figure 1, grey), suggesting that the structural  
162 'core' of invadolysin may resemble that of leishmanolysin. The numbered black circles represent  
163 which cysteines are disulphide-bonded with one another within the leishmanolysin crystal structure  
164 (Schlagenhauf *et al.*, 1998).

165

### 166 **Proteolytic activity of invadolysin is important for its role in lipid accumulation**

167 Our previous studies suggested a crucial role for invadolysin in energy storage. *invadolysin*  
168 mutant third instar larvae have reduced fat body thickness and cellular cross-sectional area (Cobbe  
169 *et al.*, 2009). Critically, *invadolysin* mutants also have reduced triglyceride and glycogen levels  
170 (Chang *et al.*, 2016; McHugh *et al.*, 2004). To further analyse the role of invadolysin's conserved  
171 protease and lipase catalytic motifs in lipid and glycogen storage, transgenic *Drosophila* strains with  
172 mutated motifs were generated by site-directed mutagenesis. A protease dead (E258A) form of  
173 invadolysin was generated by mutating the glutamic acid residue within the protease motif, whilst a  
174 lipase dead (S266A) form was generated by mutating the serine residue within the lipase motif  
175 (Figure 2A). Mutant versions of invadolysin were placed under the control of a UAS promoter (Brand  
176 and Perrimon, 1993).

177 *invadolysin* transgenes were integrated into a predetermined location within the genome (in  
178 this case, on the second chromosome) using the phiC31 integration system (Bischof *et al.*, 2007).  
179 This system was exploited to minimise chromosomal positional effect on transgene expression which  
180 might affect levels or catalytic activity of the various invadolysin transgenes (Markstein *et al.*, 2008).  
181 *invadolysin* transgene expression was verified by RT-PCR using primers (diagrammed in Figure 2B)  
182 that selectively amplified the transgenic mRNA (Figure 2C, top panel). The PCR amplicons were  
183 subsequently sequenced to confirm the presence of the desired E258A and S266A mutations in the  
184 invadolysin transgenic mRNAs (Figure 2D).

185 Using the UAS-Gal4 system, we examined transgenic flies overexpressing wild type or mutant  
186 forms of invadolysin for triglyceride and glycogen levels. A tubulin-Gal4 driver was utilised to  
187 generate ubiquitous expression. Flies overexpressing wild type invadolysin accumulated significantly

188 higher levels of triglyceride compared to control animals (Figure 2E). Flies overexpressing the *lipase*-  
189 dead form of *invadolysin* also accumulated higher levels of triglyceride, suggesting that this motif  
190 was not essential to accumulate increased triglyceride. On the other hand, the ability of flies to  
191 accumulate higher amounts of triglyceride was impaired upon overexpression of a *protease*-dead  
192 form of *invadolysin*. These data suggest intriguingly that *invadolysin*'s *proteolytic* activity is  
193 important for its role in lipid accumulation. Overexpression of any of the three *invadolysin*  
194 transgenes had no significant effect on glycogen accumulation (Figure 2F). We propose that the  
195 decreased glycogen level observed in *invadolysin* mutants is likely due to impaired insulin signaling or  
196 metabolism of glycogen reserves (Chang *et al.*, 2016).

197

### 198 **An extracellular form of *invadolysin* is present in *Drosophila* hemolymph**

199 To examine if the predicted signal sequence in *invadolysin* led to secretion of the protein,  
200 *Drosophila* hemolymph was analysed by immunoblotting. Hemolymph is the invertebrate functional  
201 equivalent of vertebrate blood, and like blood in a vertebrate, is composed of a cellular component  
202 and soluble plasma (Wyatt *et al.*, 1956). The cellular component is comprised of hemocytes which  
203 include crystal cells, plasmatocytes, lamellocytes and precursor cells (Kurucz *et al.*, 2007).  
204 Immunoblotting of whole and fractionated hemolymph from adult male and female *Drosophila*  
205 identified that *invadolysin* was indeed present in soluble plasma, but intriguingly, that extracellular  
206 *invadolysin* differs in male (111 kDa) and female (46 kDa) flies (Figure 3B and C). We therefore  
207 examined male and female gonads by immunoblotting and observed that *invadolysin* similar in  
208 molecular weight to the secreted forms was present in testes and ovaries (Figure 3D and E). These  
209 results suggest testes and ovaries could be a source of secreted *invadolysin*, or alternatively, that  
210 these tissues import *invadolysin* from hemolymph.

211 As discussed previously, proteins encoding a signal sequence are targeted to the  
212 endoplasmic reticulum and subsequently to the Golgi apparatus and secretory vesicles (Bendtsen *et al.*,  
213 2004). Several drugs can inhibit protein secretion by blocking the transport of vesicles along the  
214 secretory pathway. Brefeldin A disrupts protein transport from the endoplasmic reticulum to the  
215 Golgi apparatus by dissociating peripheral Golgi associated proteins. Monensin is a Na<sup>+</sup> ionophore  
216 that disrupts transport within the Golgi apparatus (Helms and Rothman, 1992; Mollenhauer *et al.*,  
217 1990). Tunicamycin inhibits N-glycosylation in the endoplasmic reticulum inducing endoplasmic  
218 reticulum stress which in turn inhibits protein secretion (Iwata *et al.*, 2016). Feeding *Drosophila* a  
219 cocktail of Brefeldin A/Monensin or Tunicamycin decreased the level of *invadolysin* in male plasma  
220 (Figure 3F). On the other hand, treatment with the protein transport inhibitors resulted in no change  
221 in the levels of *invadolysin* in female plasma (Figure 3G). This result suggests that different  
222 mechanisms are responsible for the deposition of *invadolysin* in male vs female hemolymph. In



223 addition, the 46 kDa female form of invadolysin may have a longer half-life than the 111 kDa form  
224 observed in males.

225

## 226 **Invadolysin is a component of vertebrate blood**

227 We aimed to determine whether invadolysin was also extracellularly present in higher  
228 eukaryotes. Fractionated mouse blood was analysed for the presence of invadolysin. Two different  
229 invadolysin antibodies, R2192 and G6456, raised against different epitopes of the protein (Figure 4A)  
230 detected an extracellular form of invadolysin (Figure 4B-C). A 53 kDa form of invadolysin was  
231 detected in whole mouse blood, and also serum and plasma fractions. The R2192 antibody further  
232 detected a 66 kDa form of invadolysin enriched in the blood cell fraction (Figure 4B). An extracellular  
233 form of invadolysin at a similar molecular weight of 51-53 kDa was also detected in two samples each  
234 of rat and pig plasma (Figure 4D-E).

235 Immunoblotting of human plasma with two antibodies recognising distinct epitopes of  
236 invadolysin separated by 408 amino acids, G3646 and G6456, detected invadolysin at ~51 kDa in six  
237 control samples (Figure 4F-G). This band was less readily detected with the G6456 antibody which  
238 may be due to the proximity of albumin and immunoglobulin heavy chain, accounting for 70-80% of  
239 the total protein content of plasma (Liu *et al.*, 2011; Steel *et al.*, 2003). To improve the detection of  
240 invadolysin, abundant plasma proteins were removed using a commercially-available abundant  
241 plasma protein removal kit (Materials and Methods). Immunoblotting of human plasma by G6456  
242 after depletion of the 12 most abundant proteins dramatically improved detection of invadolysin as  
243 evidenced by increased intensity and resolution of invadolysin (Figure 4H). After depletion of the  
244 abundant proteins from plasma, invadolysin appears to migrate at 58 kDa rather than ~51 kDa in  
245 whole plasma. This result corroborates the suggested impact on the migration of invadolysin by  
246 abundant plasma proteins in the 50-70 kDa molecular weight range. Most importantly, these results  
247 demonstrate that deposition of invadolysin into an organism's circulation is conserved amongst  
248 higher eukaryotes.

249

## 250 **Extracellular invadolysin is glycosylated and present in the extracellular vesicular fraction**

251 To simplify the composition of the plasma fraction containing invadolysin, we set about  
252 developing a biochemical enrichment for invadolysin. Polyethylene glycol has been used to enrich a  
253 particular fraction from a complex protein mixture such as serum or plasma (Haskó *et al.*, 1982).  
254 Precipitation of human plasma with different concentrations of PEG (4-10%) clearly shows that  
255 invadolysin can be enriched in the PEG-pellet with relatively low concentrations (Figure 5A). We  
256 anticipate that the polyethylene glycol precipitation procedure developed in this study will facilitate  
257 subsequent detailed analyses of invadolysin structure and function in vertebrates.



258 Human plasma invadolysin in the 8% PEG supernatant and pellet and fractions was analysed  
259 for N- and O-linked glycosylation, as well as for GPI-anchor addition, following enzymatic treatment  
260 and immunoblotting for shifts in electrophoretic migration. PNGase F removes N-linked  
261 glycosylation, and O-Glycosidase removes O-linked glycosylation (Magnelli *et al.*, 2011), while PI-PLC  
262 is used to remove GPI-anchors (Lehto and Sharom, 2002). While neither calf intestinal phosphatase  
263 (CIP) nor PI-PLC treatment resulted in a change to the migration of invadolysin, a faster  
264 electrophoretic migration was observed following treatment of both supernatant and pellet fractions  
265 with PNGase F and O-Glycosidase (Figure 5B and C). The prominent bands at ~35 and ~150 kDa in  
266 the PNGase F and O-Glycosidase lanes represent the added enzymes respectively (red asterisks).  
267 These results demonstrate that invadolysin in human plasma is N- and O-glycosylated, but not GPI-  
268 anchored.

269 Plasma, as the soluble component of blood, is a complex fraction including numerous  
270 different vesicular fractions such as exosomes, microvesicles, membrane particles and apoptotic  
271 bodies (EL Andaloussi *et al.*, 2013). Exosomes are cell-derived vesicles that play a vital role in  
272 intercellular signaling (Théry *et al.*, 2002). We analysed human plasma fractions enriched for  
273 extracellular vesicles for the presence of invadolysin. In this fractionation, the extracellular vesicle  
274 fraction contains both exosomes and microvesicles. Purification of this compartment was verified by  
275 the presence of flotillin I (Figure 6A). Immunoblotting for invadolysin with the non-overlapping  
276 G3646 and G6456 antibodies demonstrated invadolysin to be present in all plasma fractions analysed  
277 (Figure 6B and C). However, a strong signal for invadolysin in the plasma fraction enriched for  
278 extracellular vesicles, suggests invadolysin may play a role in extracellular vesicle biology.

## 279 Discussion

280

281 The results presented herein are focused on the catalytic motifs and biosynthesis of the  
282 conserved metalloprotease invadolysin. Invadolysin has a metalloprotease motif, a third histidine  
283 residue and a downstream Met-turn - features characteristic of metzincin metalloproteases (McHugh  
284 *et al.*, 2004)(Gomis-Rüth, 2003). Leishmanolysin (Gp63), the closest homolog of invadolysin, is the  
285 founding member of the M8 family of metalloproteases (Gomis-Rüth, 2003). Invadolysin however  
286 also has a conserved lipase motif downstream of (but very near) the conserved metalloprotease  
287 motif. Does invadolysin act as a protease, a lipase or both? No other protein has been shown to  
288 have dual proteolytic and lipolytic activity. Our earliest studies demonstrated increased levels of a  
289 number of nuclear envelope proteins in *Drosophila* larval extracts and cleavage of lamin by  
290 invadolysin in an *in vitro* assay, suggesting the presence of proteolytic activity (McHugh *et al.*, 2004).  
291 Invadolysin is also the only protease described as localising to lipid droplets - shown by  
292 immunofluorescence as well as biochemical fractionation of cells (Cobbe *et al.*, 2009). We showed  
293 that invadolysin localises to newly formed lipid droplets in cultured cells following refeeding after  
294 serum starvation and increases during adipogenesis of murine 3T3-L1 and human SGBS cells,  
295 coincident with an increase in the lipid depot during adipocyte differentiation (Chang *et al.*, 2016).  
296 These studies thus point toward a role for invadolysin in lipid metabolism and insulin signaling  
297 (Chang *et al.*, 2016; Cobbe *et al.*, 2009).

298 Using transgenic *Drosophila* strains that overexpress wild type, protease- or lipase-dead  
299 forms of invadolysin, we examined the role of these conserved motifs on lipid and glycogen  
300 accumulation. Flies overexpressing wild type or lipase-dead forms of invadolysin achieved  
301 significantly higher triglyceride to protein ratios compared to control animals – suggesting the lipase  
302 motif is not important in this context. On the other hand, *Drosophila* overexpressing the protease-  
303 dead invadolysin transgene were unable to accumulate excess triglyceride, and the triglyceride to  
304 protein ratio remained similar to control animals. These results strongly suggest that the protease  
305 motif of invadolysin is important for a role in lipid accumulation, though mechanistically how is not  
306 clear from these experiments. This is the first direct evidence that proteolytic activity is necessary  
307 for invadolysin's function.

308 While overexpression of the invadolysin transgenes had no significant impact on the  
309 glycogen to protein ratio compared to control animals, in a loss-of-function context, glycogen levels  
310 were significantly reduced in *invadolysin* mutants (Chang *et al.*, 2016). Impaired insulin signaling in  
311 *invadolysin* mutants would be predicted to affect glycogen accumulation, leading to the observed  
312 lower glycogen to protein ratio in *invadolysin* mutants (Chang *et al.*, 2016). Taken together, our

313 results strongly suggest a role for invadolysin in normal physiology – potentially in an extracellular,  
314 endocrine signaling context.

315         With the goal to understand the biosynthesis of invadolysin, we examined the sequence for  
316 potential post-translational modifications. Sequence analysis programmes highlighted an N-terminal  
317 signal sequence, numerous N- and O-linked glycosylation sites, and consensus for addition of a C-  
318 terminal GPI-anchor. These motifs suggest that variant 1 of invadolysin should be synthesised in the  
319 endoplasmic reticulum, while variant 2 may be translated in the cytosol. We thus examined both  
320 invertebrate hemolymph and vertebrate blood for the presence of invadolysin. Adult *Drosophila*  
321 hemolymph contained invadolysin, but unexpectedly male and female forms differed substantially in  
322 molecular weight. Treatment of *Drosophila* with drugs that inhibit protein secretion had a dramatic  
323 effect on the invadolysin level in adult male but not in female hemolymph. This observation suggests  
324 the testable hypothesis of alternative biosynthetic pathways in males versus females. Whether the  
325 expression of sexually dimorphic forms in adult flies is a mere consequence of differentiation, or an  
326 active participant in sexual dimorphism remains to be resolved.

327         Subsequently, we examined plasma from higher vertebrates such as mouse, rat, pig and  
328 human to ask whether the secretion of invadolysin was conserved in higher vertebrates. Invadolysin  
329 was detected in plasma of all species analysed to date, although we have not yet found any  
330 indication for the existence of sexually dimorphic forms in higher organisms. We also identified a  
331 distinct form of invadolysin in the cellular fraction of mouse blood. Whether this form is present in  
332 particular blood cells is currently under investigation. We determined that human plasma  
333 invadolysin was both N- and O-glycosylated, but likely not GPI-linked. Post-translational modification  
334 may be important for the interaction with specific binding partners such as regulators or substrates,  
335 leading to the modulation of invadolysin's activity.

336         What cells or tissues are responsible for the secretion of invadolysin in hemolymph or  
337 plasma is currently unclear. Immunoblotting of *Drosophila* male and female gonads for invadolysin  
338 identified invadolysin variants similar to those present in hemolymph, suggesting gonads might be  
339 responsible for invadolysin production and secretion (or that they take up invadolysin from  
340 hemolymph). Many vertebrate plasma proteins are synthesised in the liver, but whether this is true  
341 for invadolysin is unknown.

342         Leishmanolysin/GP63 has been shown to exist in three forms: intracellularly, membrane-  
343 anchored at the surface of *Leishmania*, and as a secreted form (Yao *et al.*, 2007). Leishmanolysin has  
344 also been detected in the exosome-enriched extracellular vesicular fraction. Intriguingly,  
345 zymography of exosome fractions from wild type and Leishmanolysin-knockout *Leishmania major*  
346 strains showed that knockout of leishmanolysin diminished exosome-associated proteolytic activity  
347 (Hassani *et al.*, 2014). We examined fractionated human plasma to determine whether invadolysin is

348 also present in the extracellular vesicular fraction. While clearly present in the purified extracellular  
349 vesicle fraction (containing exosomes and microvesicles), invadolysin could also be detected in the  
350 other fractions of human plasma. We therefore postulate that invadolysin - like leishmanolysin - is  
351 present in different locations, participating in diverse functions.

352         The soluble fraction of blood is an extraordinarily complex and dynamic assembly of diverse  
353 components that plays a wide variety of roles in regulating signal transduction, cell proliferation,  
354 differentiation, migration and apoptosis in metazoa (György *et al.*, 2011). Our discovery of  
355 invadolysin in readily accessible vertebrate plasma opens the doors to biochemical and physiological  
356 analyses not particularly tractable with the limited quantities of invertebrate hemolymph obtainable.  
357 Identification of proteins interacting with invadolysin will help in understanding the network of  
358 invadolysin's mechanism of action. Is invadolysin active in vertebrate blood? If so, what are its  
359 substrates, and how is its activity regulated? Examination of human plasma from control and disease  
360 states will shed light on whether invadolysin acts as a biomarker for any pathophysiological states.  
361 We anticipate that the study of invadolysin in the extracellular milieu will continue to yield novel  
362 insights into this conserved metalloprotease.

## 363 **Materials and Methods**

364

### 365 ***In silico* and statistical analysis**

366 Amino acid sequences were obtained from the Ensembl genome browser and ClustalX was  
367 used for multiple protein sequence alignments. Jalview was used to annotate and highlight key  
368 elements of the protein sequence and generate schematics. The programmes used for *in silico*  
369 analysis of amino acid sequence features are described in the text. GraphPad Prism 5 was used to  
370 carry out statistical analysis of data and generate graphs.

371

### 372 ***Drosophila* experiments**

373 All fly stocks were maintained at 25°C on a standard medium unless otherwise stated. Fly  
374 stocks used in this study were: Canton S (wild-type),  $y w P\{nos\text{-}\phi C31\}X; attP40, y w;$   
375  $attP40\{UASinv^{wt}\}/CyO, y w;$   $attP40\{UASinv^{wt}\}/CyO, y w;$   $attP40\{UASinv^{wt}\}/CyO$  and  $TubP\text{-}Gal4/CyO$ .  
376 For inhibition of the protein secretory pathway, adult flies were fed a cocktail of either 10.6  $\mu M$   
377 Brefeldin A / 2  $\mu M$  Monensin (Thermo Fisher Scientific) or 60  $\mu M$  Tunicamycin (Sigma) in 0.15 M  
378 sucrose for 7 hours at 25°C.

379

### 380 **Cloning, mutagenesis and generation of transgenics**

381 For generation of transgenic invadolysin constructs, *invadolysin* cDNA (RH66426) was  
382 obtained from the *Drosophila* Genomics Resource Center, Indiana University. Transgenic constructs  
383 used for generating transgenic flies were made using Thermo Fisher Scientific's gateway cloning  
384 technology. Entry clone was obtained from Invitrogen (now Thermo Fisher Scientific). Expression  
385 clones were obtained from the laboratory of Brian McCabe, Columbia University (Wang *et al.*, 2012).  
386 Mutant versions of the *invadolysin* transgene were generated by site-directed mutagenesis (Carter,  
387 1986). Primers designed for the site-directed mutagenesis reaction were obtained from Sigma and  
388 were HPLC-purified. Transgenic constructs were injected into the posterior region of *Drosophila*  
389 embryos (where pole cells would form) of a  $y, w, P\{nos\text{-}\phi C31\}X; attP40$  *Drosophila* strain. The  
390 transgenes were inserted on the second chromosome.

391

### 392 **Total RNA extraction and RT-PCR**

393 Total RNA from *Drosophila* larvae was extracted using the RNeasy Mini Kit (Qiagen) following  
394 the manufacturer's instructions. Total RNA was treated with DNase (Roche) to degrade any genomic  
395 DNA contamination. RT-PCR reactions were performed using Superscript III reverse transcriptase  
396 (Life Technologies). For specific amplification of transgenic invadolysin, PCR was performed using

397 invadolysin primers (Sigma) designed to selectively amplify the invadolysin transgene. Amplification  
398 of transgenic *invadolysin* RNA was performed using GoTaq Green Master Mix (Promega).

399

#### 400 **Triglyceride, Glycogen and Protein assay**

401 The samples for triglyceride, glycogen and protein assays were prepared as described  
402 previously (Bolukbasi *et al.*, 2012). Four adult flies (separated by gender) were homogenised in 400  
403  $\mu$ l PBS + 0.05% Tween-20. Homogenates were heat-inactivated at 65°C for 5 minutes. Samples were  
404 centrifuged at 1200 x g for 1 minute and the supernatant was transferred to a new tube. The  
405 supernatant was centrifuged again at 600 x g for 3 minutes. An aliquot of the sample was used for  
406 triglyceride, glycogen and protein assays. Triglyceride and glycogen were quantified using BioVision's  
407 Triglyceride/Glycogen Quantification Colorimetric/Fluorometric Kit, and protein was quantified using  
408 a Bradford assay kit (Sigma) following manufacturers' instructions.

409

#### 410 **Hemolymph extraction**

411 Hemolymph was extracted from adult flies in EBR solution (130 mM NaCl, 4.7 mM KCl, 1.9  
412 mM CaCl<sub>2</sub>, and 10 mM HEPES, pH 6.9) containing 20 mM EDTA (Karlsson *et al.*, 2004). Each sample  
413 was prepared by pooling hemolymph from 15 adult male or female flies. For collecting hemolymph,  
414 the thorax of the fly was punctured and flies were placed in a 0.5 ml tube with a hole in the bottom.  
415 The 0.5 ml tube was placed in a 1.5 ml Eppendorf tube containing the 100  $\mu$ l EBR solution. The tubes  
416 were spun for 20 seconds at 300 x g to collect hemolymph. Hemolymph was separated into plasma  
417 and cellular fractions by centrifugation for 10 minutes at 300 x g (Karlsson *et al.*, 2004).

418

#### 419 **Clean-up of human plasma samples**

420 The Pierce Abundant Protein Depletion Spin Columns (Cat. No.: 85164) from Thermo Fisher  
421 Scientific were utilised to remove the 12 most abundant proteins from human plasma. The proteins  
422 removed include:  $\alpha$ 1-Acid Glycoprotein (42 kDa),  $\alpha$ 1-Antitrypsin (54 kDa),  $\alpha$ 2-Macroglobulin (85  
423 kDa), Albumin (66.5 kDa), Apolipoprotein A-I (28.3 kDa), Apolipoprotein A-II (17.4 kDa), Fibrinogen  
424 (340 kDa), Haptoglobin (18, 45 kDa), IgA (55, 23 kDa), IgG (50, 23 kDa), IgM (65, 23 kDa), and  
425 Transferrin (80 kDa).

426

#### 427 **SDS-PAGE and immunoblotting**

428 Protein sample preparation and immunoblotting was performed as previously described  
429 (Cobbe *et al.*, 2009). Nitrocellulose membranes were probed with primary antibodies listed in the  
430 text, and described in previous publications. The Flotillin-1 polyclonal antibody (PA5-19713) was

431 purchased from Thermo Fisher Scientific. Horseradish peroxidase-conjugated secondary antibodies  
432 were used, and the immune-signal was detected by ECL (GE Healthcare) with Lumi-Film  
433 Chemiluminescent detection film (Roche).

434

#### 435 **Enzymatic treatment of plasma**

436 *In silico* predictions for post-translational modification of invadolysin were tested  
437 biochemically by enzymatic treatment to remove the predicted modifications. Analysis was done by  
438 immunoblotting to observe shifts in protein migration. Human plasma was treated with PNGase F  
439 (NEB; P0704S) or a mixture of O-Glycosidase (NEB; P0733S) and  $\alpha$ 2-3,6,8 Neuraminidase (NEB;  
440 P0720S) following manufacturer's instructions. For PI-PLC (Thermo Fisher Scientific), 0.1 enzyme unit  
441 was used to treat 10  $\mu$ g of whole plasma (10  $\mu$ l).

442

#### 443 **Extracellular vesicular fractionation**

444 Freshly collected blood in heparin tubes was centrifuged at 2000 x g for 30 min to obtain  
445 plasma. Plasma was then diluted with an equal volume of PBS (136.9 mM NaCl, 2.67 mM KCl, 8.10  
446 mM Na<sub>2</sub>HPO<sub>4</sub>, 1.47 mM KH<sub>2</sub>PO<sub>4</sub>, pH 7.4). Fractionation was then performed at 4°C. Plasma was  
447 centrifuged at 13,000 x g for 45 min in Eppendorf tubes. Supernatant was collected and ultra-  
448 centrifuged at 110,000 x g for 70 min. The supernatant was discarded and the pellet was  
449 resuspended in PBS. Extracellular vesicles were pelleted by ultra-centrifugation at 110,000 x g for 70  
450 min. The pellet containing the extracellular vesicles was resuspended in PBS for subsequent analysis  
451 or stored at -80°C.



452 **Acknowledgements**

453 We would like to thank Dr. Petra zur Lage and Prof. Andrew Jarman (University of Edinburgh) for  
454 advice and help with injections of transgenic constructs into *Drosophila* embryos. The McCabe lab  
455 (Columbia University) generously donated the *Drosophila* gateway destination plasmid. We would  
456 also like to acknowledge both the Bloomington *Drosophila* Stock Centre and FlyBase (a database of  
457 *Drosophila* genes and genomes) for their immense contribution to the support of research utilising  
458 *Drosophila*. We thank the CIR Blood Resource Centre at the University of Edinburgh for facilitating  
459 the examination of control human plasma samples.

460

461

462 **Competing Interests**

463 No competing interests declared.

464

465

466 **Funding**

467 We wish to acknowledge the Wellcome Trust for a Seed Award to MMSH, and the BHF Centre for  
468 Research Excellence Award at the University of Edinburgh for support.

469 **Figure Legends**

470

471 **Figure 1.** Multiple sequence alignment of invadolysin protein sequence from *Homo sapiens* (Hs.v2:  
472 variant with an alternative start site; Hs.v1: the more abundant invadolysin variant), *Mus musculus*  
473 (Mm), *Drosophila melanogaster* (Dm) with Gp63 (Leishmanolysin) using ClustalX. The schematic was  
474 generated using Jalview to highlight sequence features within the protein. Signal sequence was  
475 predicted using SignalP 4.1 Server (light blue), O-glycosylation sites were predicted using NetOGlyc  
476 4.0 Server - DTU CBS (turquoise), N-glycosylation was predicted using NetNGlyc 1.0 Server - DTU CBS  
477 (orange) and GPI-anchor addition was predicted using big-PI Predictor (darker blue). The conserved  
478 metalloprotease motif and the third histidine residue are highlighted in red and the downstream  
479 Met-turn is highlighted in green. The conserved metalloprotease motif, third histidine and the  
480 downstream Met-turn are the key identifying features of metalloprotease that places invadolysin in  
481 the Leishmanolysin M8 subclass of metalloprotease. Adjacent to the conserved metalloprotease  
482 motif in invadolysin is a fairly conserved lipase motif (purple). Cysteine residues conserved between  
483 invadolysin and leishmanolysin are highlighted in grey and those that have been identified to form  
484 disulphide bonds in Leishmanolysin have been numbered (Schlagenhauf *et al.*, 1998). An  
485 alternatively spliced 37 amino acid exon (in human) is between the two yellow arrowheads.

486

487 **Figure 2.** A) Schematic of wild type, protease- and lipase-dead versions of invadolysin highlighting  
488 the sites of the introduced mutations. B) Schematic of endogenous and transgenic invadolysin RNA  
489 illustrating the primers that selectively amplify transgenic invadolysin. C) RT-PCR showed that the  
490 invadolysin transgene can be expressed using a ubiquitous tubulin-Gal4 driver. D) Sequencing results  
491 from analysis of PCR amplicons confirmed that the transgenic flies have the induced mutations in the  
492 invadolysin transgenes. E) Triglyceride:protein ratio in flies overexpressing either wild type or  
493 mutant versions of invadolysin. Flies overexpressing wild type and the lipase-dead form of  
494 invadolysin had a significantly higher triglyceride:protein ratio than control flies, while flies  
495 overexpressing the protease-dead form of invadolysin failed to accumulate excess lipids, highlighting  
496 the importance of the metalloprotease motif in lipid accumulation. F) Glycogen:protein ratio in flies  
497 overexpressing either wild type or mutant versions of invadolysin. There was no significant  
498 difference in glycogen:protein ratio comparing the transgenic invadolysin strains with the control  
499 flies suggesting neither proteolytic nor lipolytic activity were directly important for glycogen  
500 accumulation.

501

502 **Figure 3.** A) Schematic of *Drosophila* invadolysin with the G4100 antibody epitope highlighted. B)  
503 and C) Hemolymph fractions from male and female adult *Drosophila* respectively. A secreted form of  
504 invadolysin can be detected in the soluble hemolymph fraction of both males and females. D) and E)  
505 Invadolysin in gonads and soluble hemolymph in male and female *Drosophila* respectively show  
506 similar molecular weight forms. F) and G) Analysis of the effects of protein transport inhibitors on  
507 secretion of invadolysin in male and female *Drosophila* respectively. Feeding flies either Tunicamycin  
508 or Brefeldin A/Monensin resulted in decreased invadolysin in adult male plasma, but did not affect  
509 the level of invadolysin in adult female plasma.

510  
511 **Figure 4.** A) Schematic of alternative variants of human invadolysin. Epitopes against which  
512 antibodies to invadolysin have been generated are highlighted. B) and C) Mouse blood fractions  
513 probed with R2192 and G6456 antibodies identified a secreted form of invadolysin in serum and  
514 plasma fractions of mouse blood. R2192 further detected a 66 kDa form of invadolysin that was  
515 enriched in the cellular fraction of blood. D) and E) Secreted invadolysin was further identified in rat  
516 and pig plasma. F) and G) Human plasma probed using G3646 and G6456 antibodies identified a  
517 secreted form of invadolysin. H) Human plasma probed with G6456 anti-invadolysin antibody after  
518 abundant proteins have been removed by chromatography. After removal of abundant plasma  
519 proteins, the invadolysin signal becomes more prominent and better resolved.

520  
521 **Figure 5.** A) PEG 6000 precipitation of human plasma to enrich for invadolysin using PEG  
522 concentrations ranging from 4-10%. Aliquots of supernatant and pellet fractions were probed with  
523 the G3646 antibody. B) and C) Analysis of post-translational modification of invadolysin in PEG-  
524 precipitated supernatant and pellet respectively after 8% PEG 6000 precipitation of human plasma.  
525 Samples were treated with CIP/Calf Intestinal Phosphatase (phosphorylation), PI-PLC (GPI-anchor),  
526 PNGase F (N-linked glycosylation) and O-Glycosylase (O-linked glycosylation). Enzymatic treatment  
527 and subsequent immunoblotting demonstrated that invadolysin in human plasma is N- and O-  
528 glycosylated, but likely not GPI-linked. The prominent bands at ~35 and ~150 kDa (red asterisks) in  
529 the PNGase F and O-Glycosidase lanes represent the added enzymes respectively.

530  
531 **Figure 6.** Ultracentrifugation of human plasma to enrich extracellular vesicles and immunoblotting  
532 for invadolysin identified invadolysin in the extracellular vesicular fraction. A) Flotillin-1 is utilised as  
533 a positive marker for the extracellular vesicle fraction. B) and C) Probing of centrifugation fractions  
534 with invadolysin antibodies G3646 and G6456.

## 535 References

- 536  
537 Aebi, M. (2013). N-linked protein glycosylation in the ER. *Biochim Biophys Acta* 1833, 2430-2437.
- 538 Bendtsen, J.D., Jensen, L.J., Blom, N., Von Heijne, G., and Brunak, S. (2004). Feature-based prediction  
539 of non-classical and leaderless protein secretion. *Protein Eng Des Sel* 17, 349-356.
- 540 Birkedal-Hansen, H., Moore, W.G., Bodden, M.K., Windsor, L.J., Birkedal-Hansen, B., DeCarlo, A., and  
541 Engler, J.A. (1993). Matrix metalloproteinases: a review. *Crit Rev Oral Biol Med* 4, 197-250.
- 542 Bischof, J., Maeda, R.K., Hediger, M., Karch, F., and Basler, K. (2007). An optimized transgenesis  
543 system for *Drosophila* using germ-line-specific phiC31 integrases. *Proc Natl Acad Sci U S A* 104,  
544 3312-3317.
- 545 Brand, A.H., and Perrimon, N. (1993). Targeted gene expression as a means of altering cell fates and  
546 generating dominant phenotypes. *Development* 118, 401-415.
- 547 Brix, K., Scott, C.J., and Heck, M.M.S. (2013). Compartmentalization of Proteolysis In Proteases:  
548 Structure and Function. K. Brix, and W. Stocker, eds. (Springer), pp. 85-125.
- 549 Carter, P. (1986). Site-directed mutagenesis. *Biochem J* 237, 1-7.
- 550 Cathcart, J.M., and Cao, J. (2015). MMP Inhibitors: Past, present and future. *Front Biosci (Landmark*  
551 *Ed)* 20, 1164-1178.
- 552 Chang, C.W., Abhinav, K., Di Cara, F., Panagakou, I., Vass, S., and Heck, M.M. (2016). A role for the  
553 metalloprotease invadolysin in insulin signaling and adipogenesis. *Biol Chem*.
- 554 Cobbe, N., Marshall, K.M., Gururaja Rao, S., Chang, C.W., Di Cara, F., Duca, E., Vass, S., Kassan, A., and  
555 Heck, M.M. (2009). The conserved metalloprotease invadolysin localizes to the surface of lipid  
556 droplets. *J Cell Sci* 122, 3414-3423.
- 557 Di Cara, F., Duca, E., Dunbar, D.R., Cagney, G., and Heck, M.M. (2013). Invadolysin, a conserved lipid-  
558 droplet-associated metalloproteinase, is required for mitochondrial function in *Drosophila*. *J Cell*  
559 *Sci* 126, 4769-4781.
- 560 Eisenhaber, B., Bork, P., and Eisenhaber, F. (1999). Prediction of potential GPI-modification sites in  
561 proprotein sequences. *J Mol Biol* 292, 741-758.
- 562 Eisenhaber, B., Bork, P., and Eisenhaber, F. (2001). Post-translational GPI lipid anchor modification of  
563 proteins in kingdoms of life: analysis of protein sequence data from complete genomes. *Protein*  
564 *Eng* 14, 17-25.
- 565 EL Andaloussi, S., Mäger, I., Breakefield, X.O., and Wood, M.J. (2013). Extracellular vesicles: biology  
566 and emerging therapeutic opportunities. *Nat Rev Drug Discov* 12, 347-357.
- 567 Flexner, C. (1998). HIV-protease inhibitors. *N Engl J Med* 338, 1281-1292.
- 568 Fujita, M., and Kinoshita, T. (2012). GPI-anchor remodeling: potential functions of GPI-anchors in  
569 intracellular trafficking and membrane dynamics. *Biochim Biophys Acta* 1821, 1050-1058.
- 570 Goettig, P. (2016). Effects of Glycosylation on the Enzymatic Activity and Mechanisms of Proteases.  
571 *Int J Mol Sci* 17.
- 572 Gomis-Rüth, F.X. (2003). Structural aspects of the metzincin clan of metalloendopeptidases. *Mol*  
573 *Biotechnol* 24, 157-202.
- 574 GROSS, J., and LAPIERE, C.M. (1962). Collagenolytic activity in amphibian tissues: a tissue culture  
575 assay. *Proc Natl Acad Sci U S A* 48, 1014-1022.
- 576 Gupta, R., and Brunak, S. (2002). Prediction of glycosylation across the human proteome and the  
577 correlation to protein function. *Pac Symp Biocomput*, 310-322.
- 578 György, B., Szabó, T.G., Pásztói, M., Pál, Z., Misják, P., Aradi, B., László, V., Pállinger, E., Pap, E., Kittel,  
579 A., et al. (2011). Membrane vesicles, current state-of-the-art: emerging role of extracellular  
580 vesicles. *Cell Mol Life Sci* 68, 2667-2688.
- 581 Haskó, F., Vaszileva, R., and Halász, L. (1982). Solubility of plasma proteins in the presence of  
582 polyethylene glycol. *Biotechnol Bioeng* 24, 1931-1939.
- 583 Hassani, K., Shio, M.T., Martel, C., Faubert, D., and Olivier, M. (2014). Absence of metalloprotease  
584 GP63 alters the protein content of *Leishmania* exosomes. *PLoS One* 9, e95007.

- 585 Helms, J.B., and Rothman, J.E. (1992). Inhibition by brefeldin A of a Golgi membrane enzyme that  
586 catalyses exchange of guanine nucleotide bound to ARF. *Nature* *360*, 352-354.
- 587 Iwata, Y., Hayashi, N., Tabara, K., Mishiba, K., and Koizumi, N. (2016). Tunicamycin-induced inhibition  
588 of protein secretion into culture medium of Arabidopsis T87 suspension cells through mRNA  
589 degradation on the endoplasmic reticulum. *Biosci Biotechnol Biochem* *80*, 1168-1171.
- 590 Kurucz, E., Váczi, B., Márkus, R., Laurinyecz, B., Vilmos, P., Zsámboki, J., Csorba, K., Gateff, E.,  
591 Hultmark, D., and Andó, I. (2007). Definition of Drosophila hemocyte subsets by cell-type specific  
592 antigens. *Acta Biol Hung* *58 Suppl*, 95-111.
- 593 Lecker, S.H., Goldberg, A.L., and Mitch, W.E. (2006). Protein degradation by the ubiquitin-  
594 proteasome pathway in normal and disease states. *J Am Soc Nephrol* *17*, 1807-1819.
- 595 Lehto, M.T., and Sharom, F.J. (2002). PI-specific phospholipase C cleavage of a reconstituted GPI-  
596 anchored protein: modulation by the lipid bilayer. *Biochemistry* *41*, 1398-1408.
- 597 Lippincott-Schwartz, J., Roberts, T.H., and Hirschberg, K. (2000). Secretory protein trafficking and  
598 organelle dynamics in living cells. *Annu Rev Cell Dev Biol* *16*, 557-589.
- 599 Liu, B., Qiu, F.H., Voss, C., Xu, Y., Zhao, M.Z., Wu, Y.X., Nie, J., and Wang, Z.L. (2011). Evaluation of  
600 three high abundance protein depletion kits for umbilical cord serum proteomics. *Proteome Sci* *9*,  
601 24.
- 602 Magnelli, P.E., Bielik, A.M., and Guthrie, E.P. (2011). Identification and characterization of protein  
603 glycosylation using specific endo- and exoglycosidases. *J Vis Exp*, e3749.
- 604 Markstein, M., Pitsouli, C., Villalta, C., Celniker, S.E., and Perrimon, N. (2008). Exploiting position  
605 effects and the gypsy retrovirus insulator to engineer precisely expressed transgenes. *Nat Genet*  
606 *40*, 476-483.
- 607 McGwire, B.S., O'Connell, W.A., Chang, K.P., and Engman, D.M. (2002). Extracellular release of the  
608 glycosylphosphatidylinositol (GPI)-linked Leishmania surface metalloprotease, gp63, is  
609 independent of GPI phospholipolysis: implications for parasite virulence. *J Biol Chem* *277*, 8802-  
610 8809.
- 611 McHugh, B., Krause, S.A., Yu, B., Deans, A.M., Heasman, S., McLaughlin, P., and Heck, M.M. (2004).  
612 Invadolysin: a novel, conserved metalloprotease links mitotic structural rearrangements with cell  
613 migration. *J Cell Biol* *167*, 673-686.
- 614 Mollenhauer, H.H., Morré, D.J., and Rowe, L.D. (1990). Alteration of intracellular traffic by monensin;  
615 mechanism, specificity and relationship to toxicity. *Biochim Biophys Acta* *1031*, 225-246.
- 616 Nielsen, H., Engelbrecht, J., Brunak, S., and von Heijne, G. (1997). Identification of prokaryotic and  
617 eukaryotic signal peptides and prediction of their cleavage sites. *Protein Eng* *10*, 1-6.
- 618 Orlean, P., and Menon, A.K. (2007). Thematic review series: lipid posttranslational modifications. GPI  
619 anchoring of protein in yeast and mammalian cells, or: how we learned to stop worrying and love  
620 glycopospholipids. *J Lipid Res* *48*, 993-1011.
- 621 Petersen, T.N., Brunak, S., von Heijne, G., and Nielsen, H. (2011). SignalP 4.0: discriminating signal  
622 peptides from transmembrane regions. *Nat Methods* *8*, 785-786.
- 623 Puente, X.S., Sánchez, L.M., Overall, C.M., and López-Otín, C. (2003). Human and mouse proteases: a  
624 comparative genomic approach. *Nat Rev Genet* *4*, 544-558.
- 625 Rao, S.G., Janiszewski, M.M., Duca, E., Nelson, B., Abhinav, K., Panagakou, I., Vass, S., and Heck, M.M.  
626 (2015). Invadolysin acts genetically via the SAGA complex to modulate chromosome structure.  
627 *Nucleic Acids Res*.
- 628 Rawlings, N.D., Barrett, A.J., and Bateman, A. (2012). MEROPS: the database of proteolytic enzymes,  
629 their substrates and inhibitors. *Nucleic Acids Res* *40*, D343-350.
- 630 Rawlings, N.D., Barrett, A.J., and Bateman, A. (2014). Using the MEROPS Database for Proteolytic  
631 Enzymes and Their Inhibitors and Substrates. *Curr Protoc Bioinformatics* *48*, 1.25.21-21.25.33.
- 632 Rodríguez-Manzaneque, J.C., Fernández-Rodríguez, R., Rodríguez-Baena, F.J., and Iruela-Arispe, M.L.  
633 (2015). ADAMTS proteases in vascular biology. *Matrix Biol*.
- 634 Schaeperl, M., Fuchs, J.E., Waldner, B.J., Huber, R.G., Kramer, C., and Liedl, K.R. (2015).  
635 Characterizing Protease Specificity: How Many Substrates Do We Need? *PLoS One* *10*, e0142658.

- 636 Schlagenhauf, E., Etges, R., and Metcalf, P. (1998). The crystal structure of the *Leishmania major*  
637 surface proteinase leishmanolysin (gp63). *Structure* 6, 1035-1046.
- 638 Spiro, R.G. (2002). Protein glycosylation: nature, distribution, enzymatic formation, and disease  
639 implications of glycopeptide bonds. *Glycobiology* 12, 43R-56R.
- 640 Steel, L.F., Trotter, M.G., Nakajima, P.B., Mattu, T.S., Gonye, G., and Block, T. (2003). Efficient and  
641 specific removal of albumin from human serum samples. *Mol Cell Proteomics* 2, 262-270.
- 642 Steentoft, C., Vakhrushev, S.Y., Joshi, H.J., Kong, Y., Vester-Christensen, M.B., Schjoldager, K.T.,  
643 Lavrsen, K., Dabelsteen, S., Pedersen, N.B., Marcos-Silva, L., et al. (2013). Precision mapping of the  
644 human O-GalNAc glycoproteome through SimpleCell technology. *EMBO J* 32, 1478-1488.
- 645 Szmola, R., Bence, M., Carpentieri, A., Szabó, A., Costello, C.E., Samuelson, J., and Sahin-Tóth, M.  
646 (2011). Chymotrypsin C is a co-activator of human pancreatic procarboxypeptidases A1 and A2. *J*  
647 *Biol Chem* 286, 1819-1827.
- 648 Théry, C., Zitvogel, L., and Amigorena, S. (2002). Exosomes: composition, biogenesis and function.  
649 *Nat Rev Immunol* 2, 569-579.
- 650 Turk, B. (2006). Targeting proteases: successes, failures and future prospects. *Nat Rev Drug Discov* 5,  
651 785-799.
- 652 Twining, S.S. (1994). Regulation of proteolytic activity in tissues. *Crit Rev Biochem Mol Biol* 29, 315-  
653 383.
- 654 Vandenberghe, P., Orrenius, S., and Zhivotovsky, B. (2005). Serine proteases and calpains fulfill  
655 important supporting roles in the apoptotic tragedy of the cellular opera. *Cell Death Differ* 12,  
656 1219-1224.
- 657 Vass, S., and Heck, M.M. (2013). Perturbation of invadolysin disrupts cell migration in zebrafish  
658 (*Danio rerio*). *Exp Cell Res* 319, 1198-1212.
- 659 Verma, R.P., and Hansch, C. (2007). Matrix metalloproteinases (MMPs): chemical-biological functions  
660 and (Q)SARs. *Bioorg Med Chem* 15, 2223-2268.
- 661 Walsh, P.N., and Ahmad, S.S. (2002). Proteases in blood clotting. *Essays Biochem* 38, 95-111.
- 662 Wang, J.W., Beck, E.S., and McCabe, B.D. (2012). A modular toolset for recombination transgenesis  
663 and neurogenetic analysis of *Drosophila*. *PLoS One* 7, e42102.
- 664 Werb, Z., Vu, T.H., Rinkenberger, J.L., and Coussens, L.M. (1999). Matrix-degrading proteases and  
665 angiogenesis during development and tumor formation. *APMIS* 107, 11-18.
- 666 Wong, H., and Schotz, M.C. (2002). The lipase gene family. *J Lipid Res* 43, 993-999.
- 667 Wong, J., Patel, R.A., and Kowey, P.R. (2004). The clinical use of angiotensin-converting enzyme  
668 inhibitors. *Prog Cardiovasc Dis* 47, 116-130.
- 669 Wyatt, G.R., LOUGHHEED, T.C., and WYATT, S.S. (1956). The chemistry of insect hemolymph; organic  
670 components of the hemolymph of the silkworm, *Bombyx mori*, and two other species. *J Gen*  
671 *Physiol* 39, 853-868.
- 672 Yao, C., Donelson, J.E., and Wilson, M.E. (2007). Internal and surface-localized major surface  
673 proteases of *Leishmania* spp. and their differential release from promastigotes. *Eukaryot Cell* 6,  
674 1905-1912.

675



*Hs.v2/1-640* 1 -----M-GR-----RSGLL---GLRPG---PEPVAL----- 19  
*Hs.v1/1-692* 1 **MVTTTLGPKMAAEWGGGVGYSGSGP-GRSRWRWSGSVWVRSVLLLLGGLRASATSTPVSLGS-SP** 62  
*Mm/1-681* 1 -----MAAAGSGGAGGPGGPRGR-----WGGCLWVRGVLVLLGGLPAGAGAAPVSLGT-SP 51  
*Dm/1-683* 1 -----MAKT-----PPLRPHGN-MAKFLAALGICSWLLV-----SATAH 33  
*Gp63/1-602* 1 -----MSVDSSTHRRRCVAARLVRLAAA-GAAVTV-----AVGTAAWAHAGALQH 46

*Hs.v2/1-640* 20 -----ERVINKVH---LK 29  
*Hs.v1/1-692* 63 PC-----RHHVP-----SDTEVINKVH---LK 81  
*Mm/1-681* 52 PC-----RHHVL-----SDTEVINKVH---LK 70  
*Dm/1-683* 34 NC-----QHQP-----KAHEVVHGV---IQ 52  
*Gp63/1-602* 47 RCVHDAMQARVRQ**S**VADHHKAPGAV**S**AVGLPYVTLDAAHTAAADPRPG**S**ARSVVRDVNWGALR 110

*Hs.v2/1-640* 30 -----ANHVVKR---DVEHLRIKTVYDKSVEELLPEKKNLVKNKLFPPQAI SYLEKT 78  
*Hs.v1/1-692* 82 -----ANHVVKR---DVEHLRIKTVYDKSVEELLPEKKNLVKNKLFPPQAI SYLEKT 130  
*Mm/1-681* 71 -----TNHVTKR---DADGHLRIKTIYDQSI EELLPEKRYLVKNKLFPPQAI SYLEKT 119  
*Dm/1-683* 53 LADS EDD**S**AGD**P**ARH**S**VR**R**R**S**VAAEQPLRI LLVYDESIVRLEEKFNLI **ND**TVLPEAVQFWEQA 116  
*Gp63/1-602* 111 IAVSTEDLT-DPAYH**C**ARV**G**HQ**V**KD**H**AGAI**A**ICTAEDI--LTNEKRDILV**K**HLI**P**QAVQLHTER 171

*Hs.v2/1-640* 79 FQVRRPAGTILL**S**RQ**C**AT**N**QY**L**RK**E**ND**P**HR**Y**CT**G**E**C**AA**H**T**K****C**GPV**I**VP**E**EH**L**Q**Q**CR**V**Y**R**GG**K**W**P** 142  
*Hs.v1/1-692* 131 FQVRRPAGTILL**S**RQ**C**AT**N**QY**L**RK**E**ND**P**HR**Y**CT**G**E**C**AA**H**T**K****C**GPV**I**VP**E**EH**L**Q**Q**CR**V**Y**R**GG**K**W**P** 194  
*Mm/1-681* 120 FQVRRPAGTILL**S**RQ**C**AT**N**QY**L**RK**E**ND**P**HR**Y**CT**G**E**C**AV**H**T**K****C**GPV**I**VP**E**EH**L**Q**Q**CR**V**CR**E**GG**K**W**P** 183  
*Dm/1-683* 117 LMVRET**K**GV**I**RL**N**R**K**CD**S**TQ**V**Y**V**K--NGH**T**HC**I**D**H**CK**A**TT**M****C**GE**V**Q**V**PD**A**HL**D**V**C**RV**C****N**A**T**G**Q**N 178  
*Gp63/1-602* 172 LKVQ**V**Q**V**G**K**W**K**V**T**DM**V**GD-----I**C**GD**F**K**V**Q**A**H**I**T----- 202

*Hs.v2/1-640* 143 HG-AVGVPDQEGISDADFVLYV**G**ALATERC**S**HENIISYAAY**C**Q**Q**EANMDR**P**IAGYANL**C**PNMIS 205  
*Hs.v1/1-692* 195 HG-AVGVPDQEGISDADFVLYV**G**ALATERC**S**HENIISYAAY**C**Q**Q**EANMDR**P**IAGYANL**C**PNMIS 257  
*Mm/1-681* 184 CG-AVGVLDP**E**GV**R**D**A**D**F**VLYV**G**ALATERC**S**HENIISYAAY**C**Q**Q**EAKMDR**P**IAGYANL**C**PNMIS 246  
*Dm/1-683* 179 CRIDSNT**Q**PG**E**IENAD**F**V**F**Y**S**AR**Q**T**Q**R**C**K**L**T**V**A**Y**A**A**H**C**Q**Q**E**A**ALDR**P**IAGHAN**L**CP**E**SIS 242  
*Gp63/1-602* 203 -----EGFSNTDFVMYVASVPSE---EGLW**A**W**A**T**T****C**Q**T**FSD-GHP**A**V**G**V**I**NI**P**AAN**I**A 251

*Hs.v2/1-640* 206 TQPQEFV**G**MLST**V**K**H**E**V**I**H**A**L****G**F**S****A**G**L**FAFYHD**K**D**G**N**P**L**T**S**R**F**A**D-GLPPF**N****S**L**G**L**Y**Q**W**S**D**K**V** 268  
*Hs.v1/1-692* 258 TQPQEFV**G**MLST**V**K**H**E**V**I**H**A**L****G**F**S****A**G**L**FAFYHD**K**D**G**N**P**L**T**S**R**F**A**D-GLPPF**N****S**L**G**L**Y**Q**W**S**D**K**V** 320  
*Mm/1-681* 247 TQPQEF**I**G**M**LST**V**K**H**E**I**I**H**A**L****G**F**S****A**G**L**FAFYHD**Q**D**G**N**P**L**T****S**R**S**A**D**-GLPPF**N****S**L**G**L**Y**Q**W**S**D**K**V** 309  
*Dm/1-683* 243 TKPQEL**Q**L**I**ST**V**K**H**E**I**L**H**A**L****G**F**S****V****S**LYAF**R**DD**D**G**K**P**R**T**P**R**K**L**D**T**G**K**P**Y**L**N**E**K**L**Q**I**H**Q**W**S****N**E**T** 306  
*Gp63/1-602* 252 SRYD**Q**L**V**TR**V**--V**T****H**E**M**A**H**A**L**G**F**S**G**--P**F**F**E**D-----A**R**I**V**A-S**V**P----- 287

*Hs.v2/1-640* 269 VRKVERL-WDVRDNK**I**VRHTVYLL**V**T**P**RV**V**E**E**ARK**H**FD**C**P**V**L**E**G**M**E**L**E**N**Q**G**V**G**T**E**L**N****H**W**E**K**R**L 331  
*Hs.v1/1-692* 321 VRKVERL-WDVRDNK**I**VRHTVYLL**V**T**P**RV**V**E**E**ARK**H**FD**C**P**V**L**E**G**M**E**L**E**N**Q**G**V**G**T**E**L**N****H**W**E**K**R**L 383  
*Mm/1-681* 310 VRKVERL-WNVRDNK**I**VRHTVYLL**V**T**P**RV**V**E**E**ARK**H**FN**C**P**V**L**E**G**M**E**L**E**N**Q**G**M**G**T**E**L**N****H**W**E**K**R**L 372  
*Dm/1-683* 307 IRKVVRE**N****S**V**R**GG**H**-V**N**K**V**DD**M**M**V**T**P**R**V**IA**E**V**R**A**H**FN**C**N**K**L**E**G**A**E**L**E**D**Q**G**E**G**T**A**L**T****H**W**E**K**R**I 369  
*Gp63/1-602* 288 -----N**V**R**G**---K**N**F**D**V**P**V**I****N****S****S****T**A**V**A**K**A**R**E**Q**Y**G****C**D**T**L**E**Y**L**E**V**E**D**Q**G**G**A**S**A**G**S****H**I**K**M**R**N 339

*Hs.v2/1-640* 332 LENE**E**AM**T****G**SHTQ**N**R**V**L**S**R**I**T**L**AL**M**E**D**T**G**W**Y**K**A****N****S****M**A**E**K**L**D**W**G**R**G**M**G**C**D**F**V**R**K**S****C**K**F**W**I**D**Q**Q**R**Q 395  
*Hs.v1/1-692* 384 LENE**E**AM**T****G**SHTQ**N**R**V**L**S**R**I**T**L**AL**M**E**D**T**G**W**Y**K**A****N****S****M**A**E**K**L**D**W**G**R**G**M**G**C**D**F**V**R**K**S****C**K**F**W**I**D**Q**Q**R**Q 447  
*Mm/1-681* 373 LENE**E**AM**T****G**SHTQ**N**R**V**L**S**R**I**T**L**AL**M**E**D**T**G**W**Y**K**A****N****S****M**A**E**K**L**D**W**G**R**G**L**G**C**E**F**V**R**K**S****C**K**F**W**I**D**Q**H**R**Q 436  
*Dm/1-683* 370 LENE**E**AM**T****G**SHT**Q**S**P**V**F**S**R**I**T**LAL**M**E**D**SG**W**Y**R**A**N****S****M**A**T**PL**T**W**G**K**L**G**C**A**F**A**M**R**S****C**K**D**W**I**Q**N**H**A** 433  
*Gp63/1-602* 340 AQD**E**L**M**A**P**AAA**A**G--Y**T**A**L**T**M**A**I**F**Q**D**L**G**F**Y**Q**A**D**F**S**K**A**E**V**M**P**W**G**Q**N**A**G****C**A**F**L**T**N**K****C**---M**E**Q**S**V**T** 399

*Hs.v2/1-640* 396 KRQML**S**PY**C**D**T**L**R**S**N**P**L**Q**L**T**C**R**Q**D**Q**R**A**V**A**V**C**N**L**Q**K**F**P**K**P**L**P**Q**E**Y**Q**Y**F**D**E**L**S**G**I****P**A**E**D**L**P**Y**Y**G**S 459  
*Hs.v1/1-692* 448 KRQML**S**PY**C**D**T**L**R**S**N**P**L**Q**L**T**C**R**Q**D**Q**R**A**V**A**V**C**N**L**Q**K**F**P**K**P**L**P**Q**E**Y**Q**Y**F**D**E**L**S**G**I****P**A**E**D**L**P**Y**Y**G**S 511  
*Mm/1-681* 437 RRQ**V**P**S**PY**C**D**T**L**R**S**N**P**L**Q**L**T**C**R**Q**D**Q**R**A**V**A**V**C**N**L**Q**R**F**P**N**L**P**P**E**Y**Q**Y**F**D**E**L**T**G**I**P**A**E**D**L**P**Y**Y**G**S 500  
*Dm/1-683* 434 RGR**S**I**H**PF**S**K**V**K**Q**D**P**L**Q**T**E****C**T**D**D**R**N**S**V**A**L**C**N**L**I**R**H**E**F**E**L**P**K**G**Y**Q**N**F**S**L**N**H**V**D**G**E**G**F**Y**G**S 497  
*Gp63/1-602* 400 QWP**A**M--F**C****N****E****S****E**D**A**---I**R****C**P**T**S**R**L**S**L**G**A**C**G**V**T**R**H**P**-G**L**P**P**Y**W**Q**Y**F**T**D-----P**S**L**A**G**V** 448

*Hs.v2/1-640* 460 VEIADY**C**P**F**S**Q**E**F**S**W**H**L**S**G**E**Y**Q**R**S**D**C**R**I**L**E**N**Q**P**E**I**F**K**N**Y**G**A**E**K**Y**G**H**S**V**C**L**I**Q**K**S**A**F**V**M**E**K**-**C 522  
*Hs.v1/1-692* 512 VEIADY**C**P**F**S**Q**E**F**S**W**H**L**S**G**E**Y**Q**R**S**D**C**R**I**L**E**N**Q**P**E**I**F**K**N**Y**G**A**E**K**Y**G**H**S**V**C**L**I**Q**K**S**A**F**V**M**E**K**-**C 574  
*Mm/1-681* 501 VEIADY**C**P**F**S**Q**E**F**S**W**H**L**S**G**E**Y**Q**R**S**D**C**R**I**L**E**N**Q**P**E**L**F**K**N**Y**G**A**E**Q**Y**G**H**S**V**C**L**L**Q**K**S**A**F**I**M**E**Q**-**C 563  
*Dm/1-683* 498 VSLADH**C**P**Y**I**Q**E**F**T**W**R**S**K**N**V**I**V**R**G**S**H**C**R**F****T**E**N**N**P**R**E**K**N**F**A**L**E**S**Y**G**E**G**A**K**F**D**H**S**E**S**M**W**E**R**S****C** 561  
*Gp63/1-602* 449 SA**F**M**D**Y**C**P**V**V**V**P**S**--D**G**S**T**Q**R**A**S**-----E**A**H**A**S**L**L**P**F**N**V**F**S**D**A**A**R**C** 489

*Hs.v2/1-640* 523 ERKLSY**P**D**W**G**S**G-----**C**Y**Q**V**S****C**S**P**Q**L**K**V**W**V**Q---D**T**S**Y**L**C**S**R**A**G**Q**V**L**P**V**S**I**Q**M**N**G**W**I**H**D 575  
*Hs.v1/1-692* 575 ERKLSY**P**D**W**G**S**G-----**C**Y**Q**V**S****C**S**P**Q**L**K**V**W**V**Q---D**T**S**Y**L**C**S**R**A**G**Q**V**L**P**V**S**I**Q**M**N**G**W**I**H**D 627  
*Mm/1-681* 564 ERKLSY**P**D**W**G**S**G-----**C**Y**Q**V**S****C**S**P**Q**L**K**V**W**V**Q---D**T**S**Y**L**C**S**R**A**G**Q**V**L**P**V**R**I**Q**M**N**G**W**I**H**N 616  
*Dm/1-683* 562 HQ**T**R**E**W**Q**H**W**G**S**G-----**C**Y**K**Y**D****C**F**D**G**R**L**H**I**L**V**G**---N**Y**S**Y**K**C**S**F**P**Q**K**L**S**I**R**I**A**A**N**G**W**L**H**K** 614  
*Gp63/1-602* 490 ID**G**A**F**R**P**K**A**T**D**G**I**V**K**S**Y**A**L****C**A**N**V**Q****C**D**A**T**R**T**Y**S**V**Q**V**H**G**S**N**D**Y**T**N**C**T****P**G**L**R**V**E**L**S**T**V**S**N**A**F**E**G**G** 553

*Hs.v2/1-640* 576 GNLL**C**P**S**C**W**D**F****C**-----**E**L**C**P**-**P**E****T****D**P**P**A**T****N**L**T**R**A**L**P**L**D**L**C**S**C**S-----S**S**L**V**V**T**L**W**L**L** 623  
*Hs.v1/1-692* 628 GNLL**C**P**S**C**W**D**F****C**-----**E**L**C**P**-**P**E****T****D**P**P**A**T****N**L**T**R**A**L**P**L**D**L**C**S**C**S-----S**S**L**V**V**T**L**W**L**L** 675  
*Mm/1-681* 617 GNLL**C**P**S**C**W**D**F****C**-----**E**Q**C**P**-**P**E****T****D**P**P**A**A****N**L**T**R**A**L**P**L**D**L**C**S**C**S-----S**S**L**V**V**T**L**W**L**L** 664  
*Dm/1-683* 615 G**A**I**M****C**P**P**C**H**E**L****C**G**A**Q**F**A**A**Q**G**K**Q**C**R**-P**G**E**E**P**D**P**L**N---K**Y**P**R**D**N**L**A****C**G**A**G**S**E**K**S**R**S**V**A**I**I**T**A**V**L**L** 674  
*Gp63/1-602* 554 G**Y**I**T****C**P**P**Y**V**E**V****C**-----**Q**G**N**V**Q**A**A**K**D**G**G****N**T**A**A**G**R**R**G**P**R**A**A**A**T**A**L**L**V**A**A**L**L 598

*Hs.v2/1-640* 624 LG**N**L**F**P**L**L**A**G**F**L**L**C**I**W**H** 640  
*Hs.v1/1-692* 676 LG**N**L**F**P**L**L**A**G**F**L**L**C**I**W**H** 692  
*Mm/1-681* 665 LG**N**L**F**P**L**L**A**G**F**L**L**C**V**W**H** 681  
*Dm/1-683* 675 ---L**F**G**L**R**W**G**F**S----- 683  
*Gp63/1-602* 599 A**V**A**L**----- 602



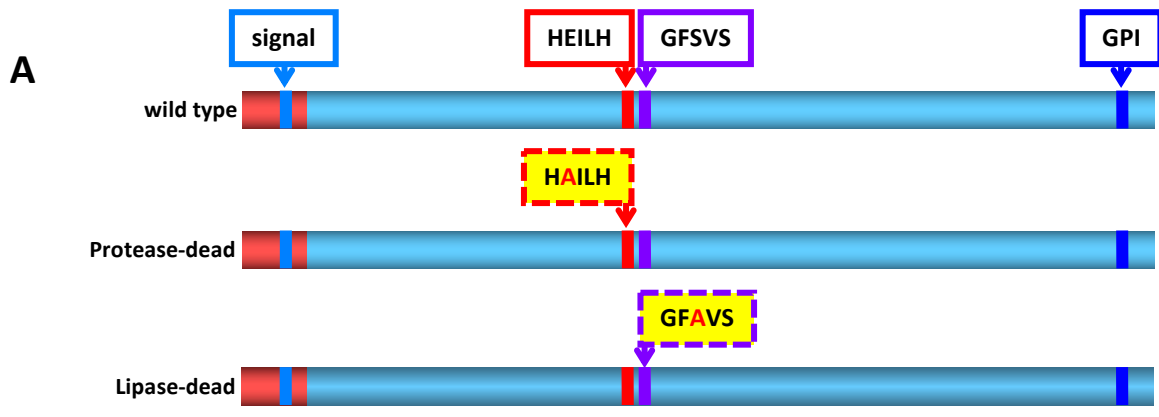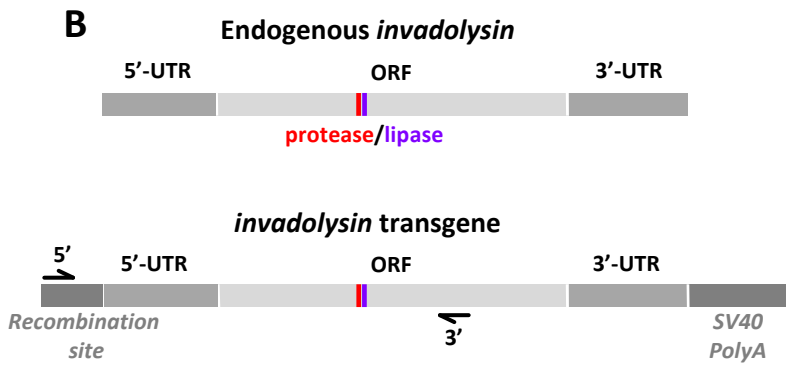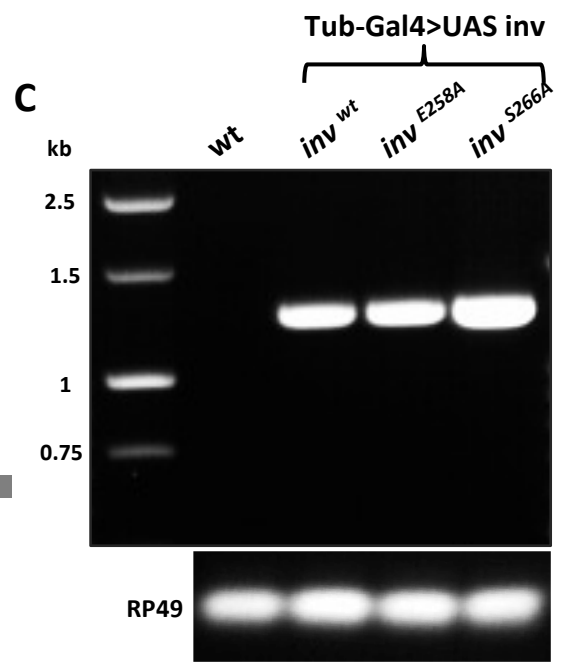

**D**

Amino Acid V K H E/A I L H A L G F S/A V S L Y A L E

Wild Type GTAAAGCACGAGATTCTCCATGCAC TGGGATTCTCCGTGAGCTTGTACGCATTCTTT

E258A GTAAAGCACGCGATTCTCCATGCAC TGGGATTCTCCGTGAGCTTGTACGCATTCTTT

S266A GTAAAGCACGAGATTCTCCATGCAC TGGGATTCGCCGTGAGCTTGTACGCATTCTTT

\*\*\*\*\*

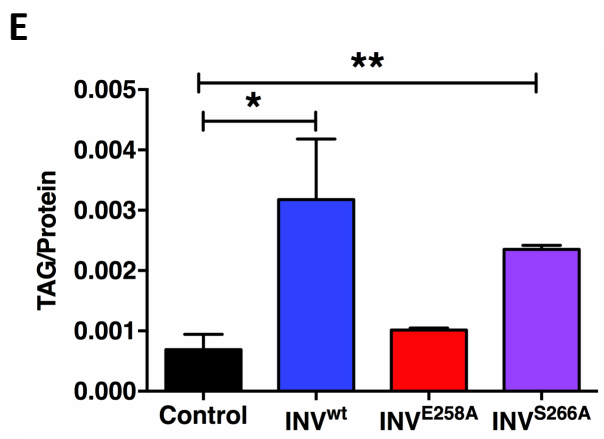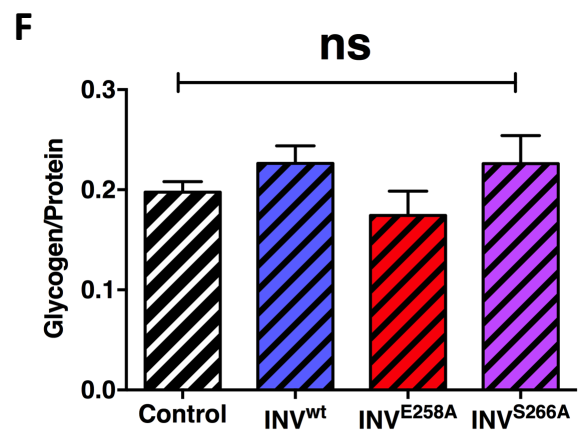

Abhinav et al.,  
Figure 2

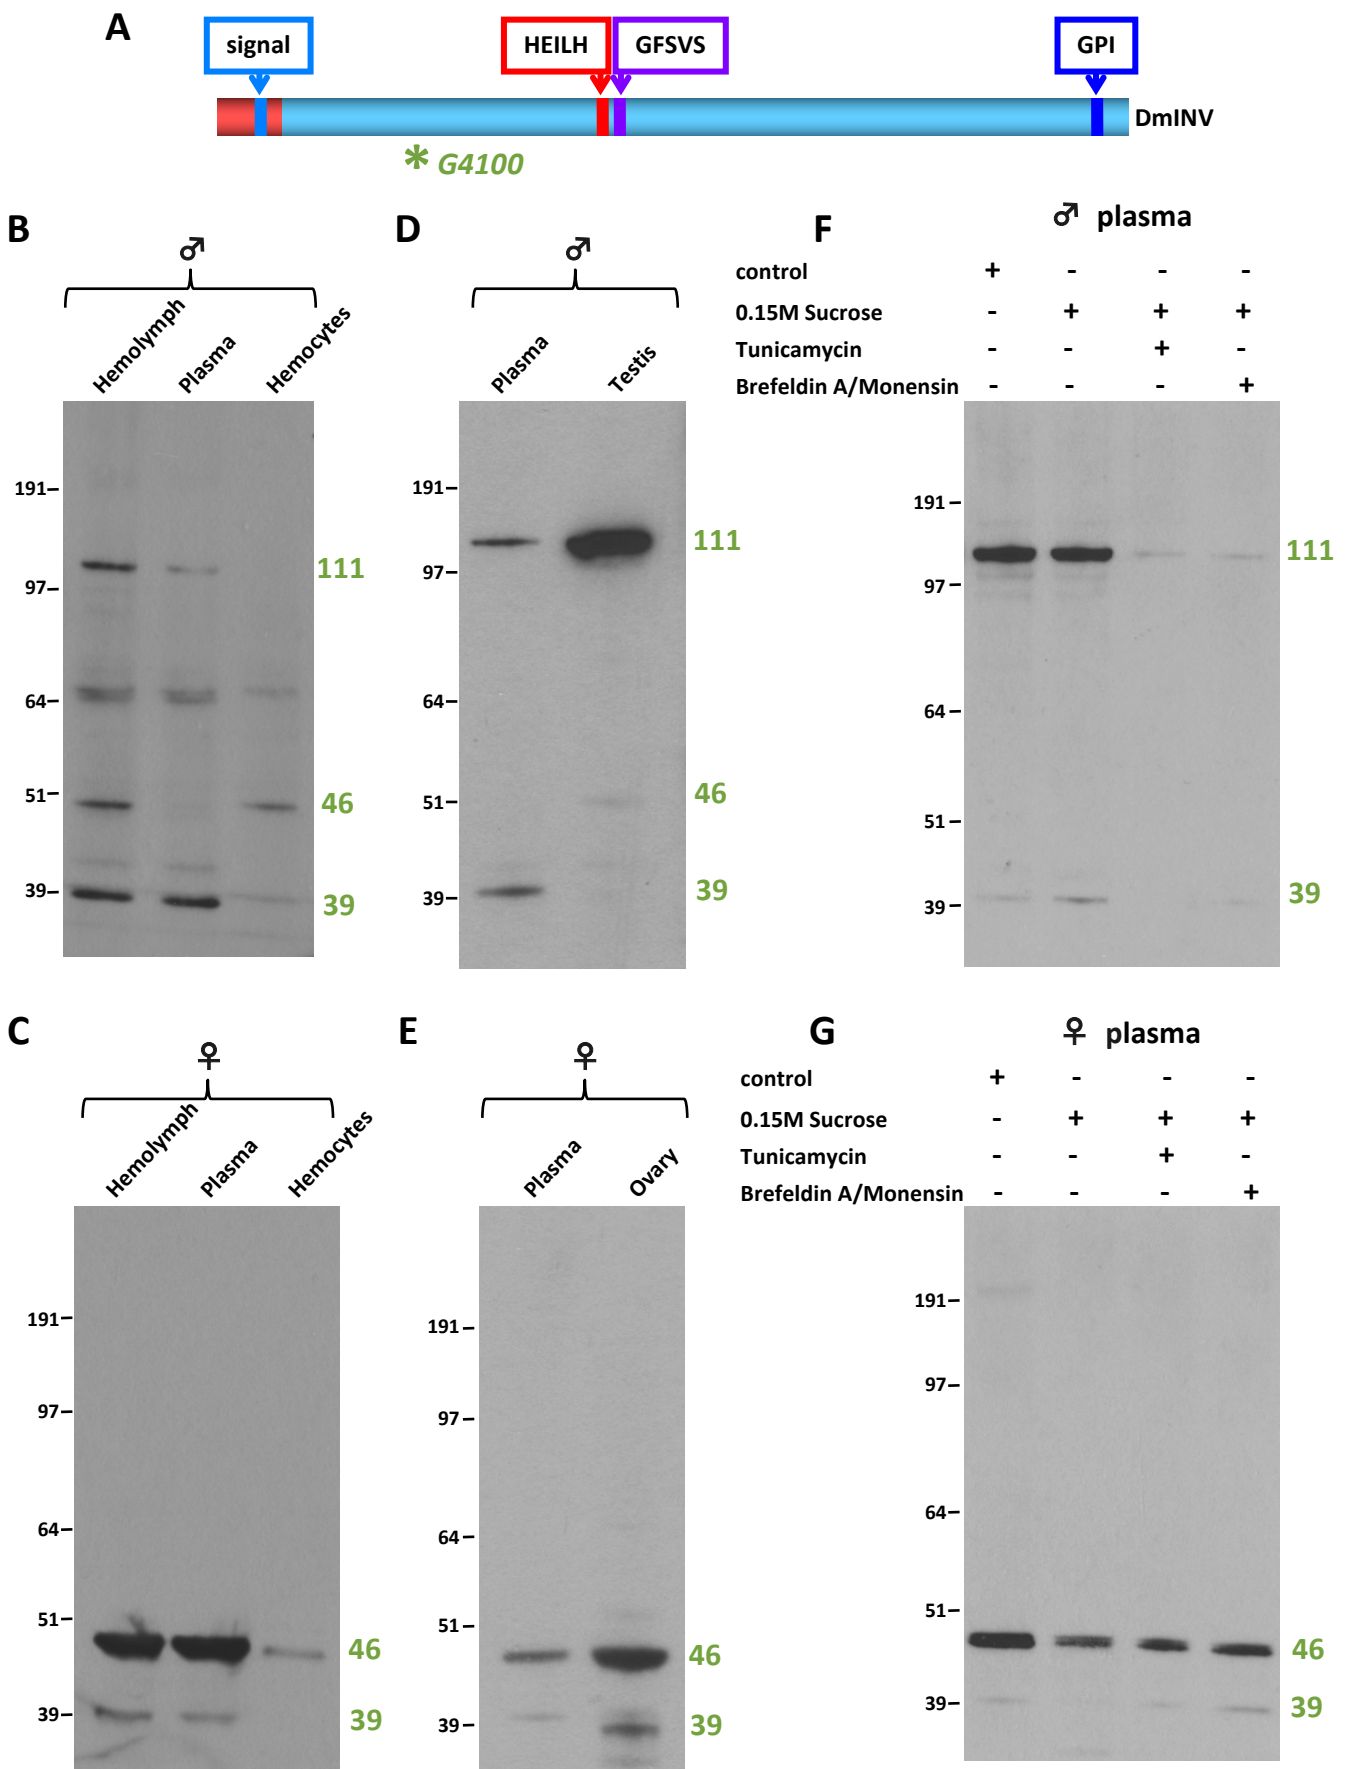

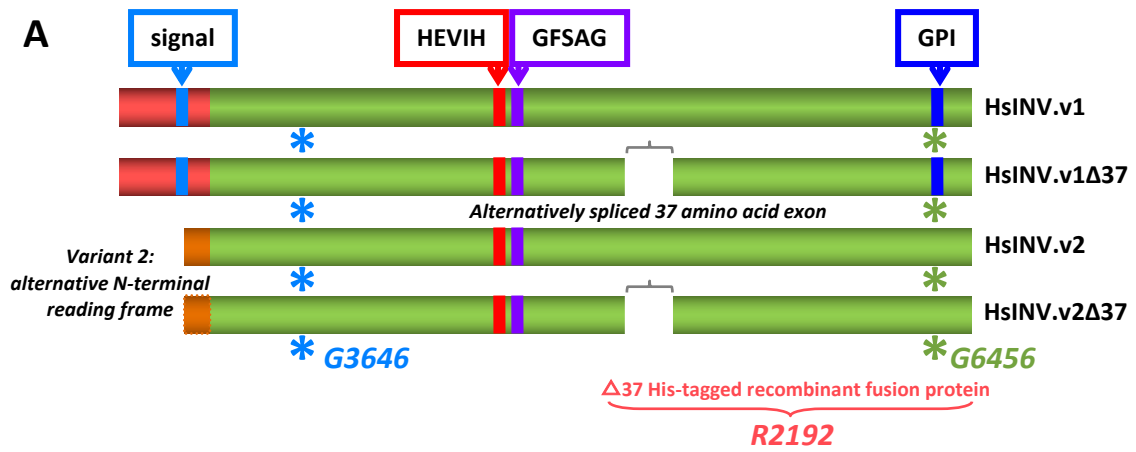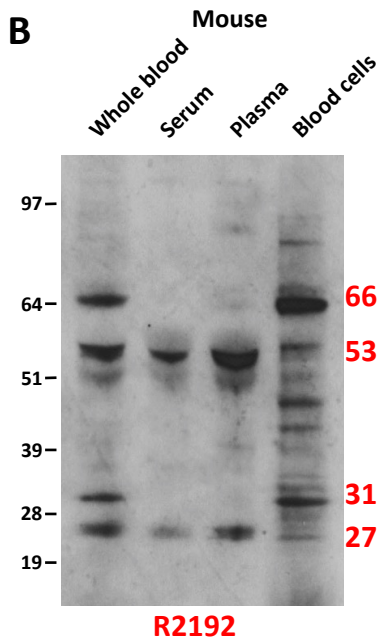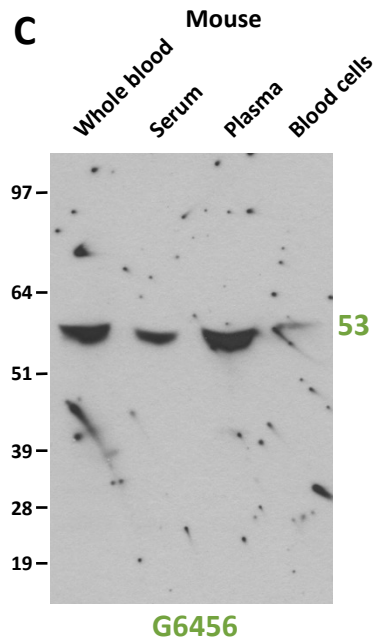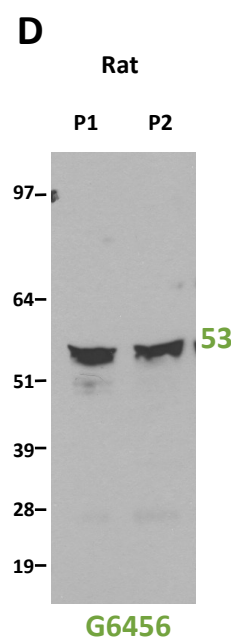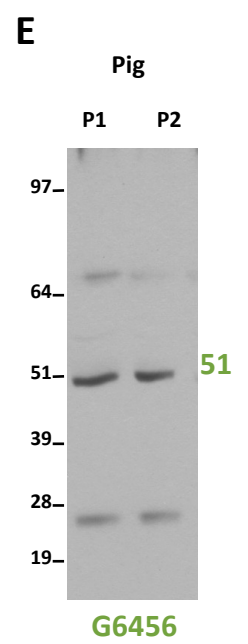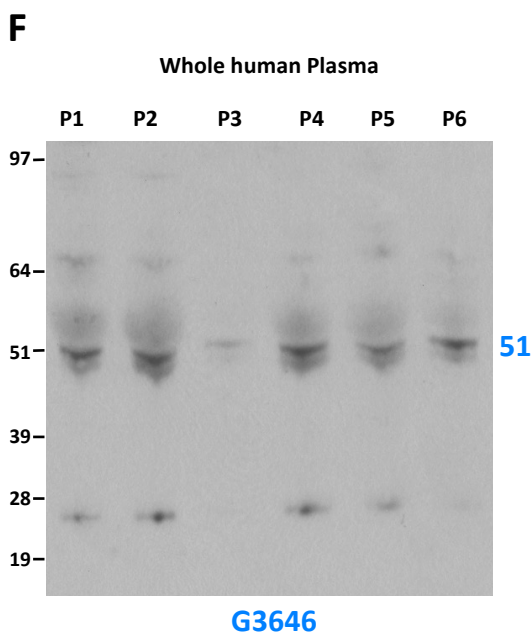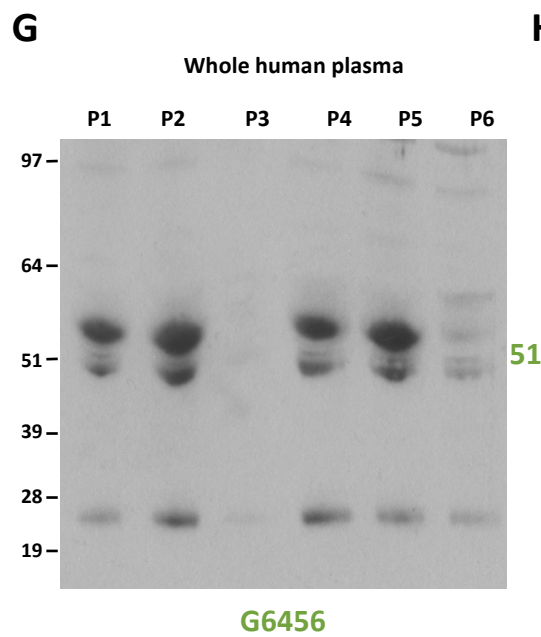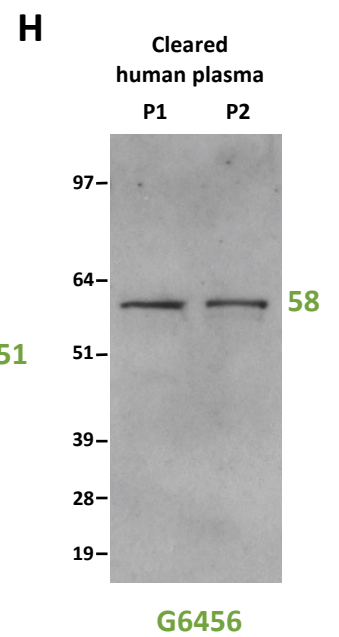

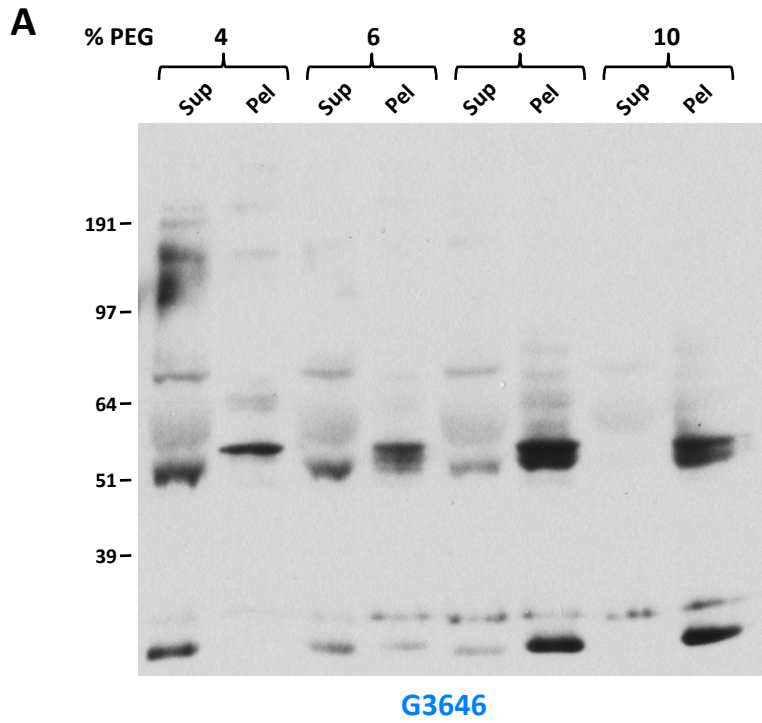

**B**

| Incubation (min) | 0 | 120 | 120 | 120 | 120 | 120 |
|------------------|---|-----|-----|-----|-----|-----|
| CIP              | - | +   | -   | -   | -   | -   |
| PI-PLC           | - | -   | +   | -   | -   | -   |
| PNGase F         | - | -   | -   | +   | -   | -   |
| O-Glycosidase    | - | -   | -   | -   | +   | -   |

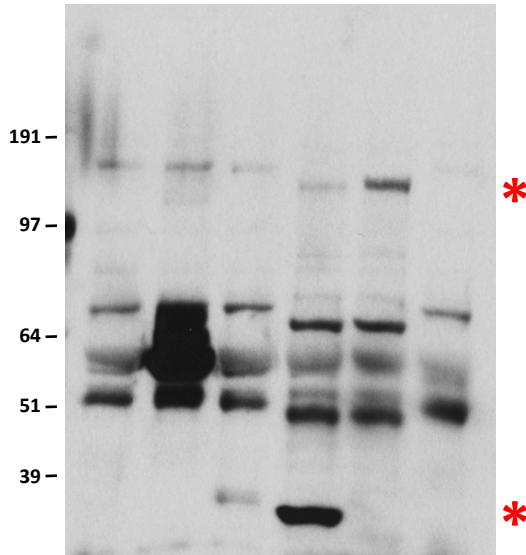

**G3646 (8% PEG supernatant)**

**C**

| Incubation (min) | 0 | 120 | 120 | 120 | 120 | 120 |
|------------------|---|-----|-----|-----|-----|-----|
| CIP              | - | +   | -   | -   | -   | -   |
| PI-PLC           | - | -   | +   | -   | -   | -   |
| PNGase F         | - | -   | -   | +   | -   | -   |
| O-Glycosidase    | - | -   | -   | -   | +   | -   |

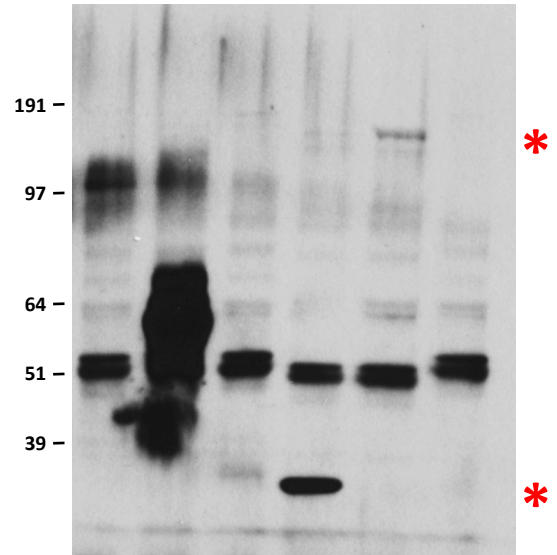

**G3646 (8% PEG pellet)**

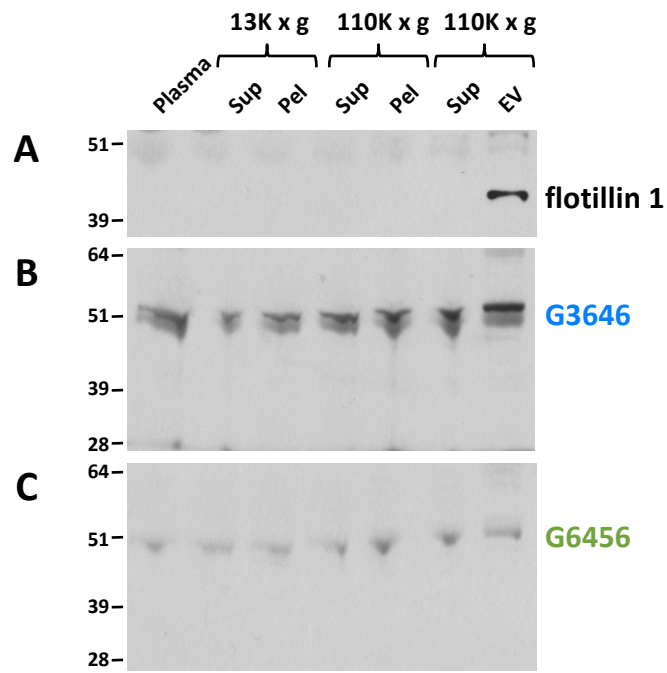

Source: https://www.biorxiv.org/content/10.1101/612127v1.full.pdf
